# Supplementary material for: Two cis-regulatory SNPs upstream of ABCG2 synergistically cause the blue eggshell phenotype in the duck
Source: PLoS Genet. 2020 Nov 13;16(11):e1009119. doi: 10.1371/journal.pgen.1009119 (PMC7688135; doi:10.1371/journal.pgen.1009119)
Supplement: S1 Table — (XLSX) [file pgen.1009119.s001.xlsx]

## Sheet: Sheet1
	Sample	Genotype	Raw reads	Clean reads	Uniquely mapped reads	Uniquely mapped ratio	Average depth
Homozygous blue-eggshelled ducks	14	AA	118600392	110442150	108234599	0.955962	10.06
	40	AA	122466948	110513466	108144524	0.957421	9.38
	46	AA	97024548	87471938	85645830	0.95798	7.35
	49	AA	99789692	89997104	88156088	0.959169	7.53
	75	AA	96436890	87307538	85728789	0.960114	7.89
	94	AA	99847108	90390088	88600545	0.95734	8.25
	13G	AA	93137002	85223164	83647970	0.961136	8.29
	17G	AA	77691852	71161478	69811475	0.959725	6.96
Heterozygous blue-eggshelled ducks	1	Aa	103499326	96589846	94716289	0.959785	8.74
	9	Aa	115096096	106955024	104900777	0.958747	9.66
	18	Aa	77586744	72106834	70607989	0.954561	6.45
	29	Aa	78766354	69256328	67830106	0.957562	7.16
	32	Aa	113867674	102176476	99883341	0.955556	8.57
	79	Aa	105301594	94682290	92930331	0.962827	9.65
	Q1	Aa	96534414	88027558	85720876	0.953079	8.07
	C14	Aa	100246678	90429950	88710445	0.959061	9.12
	C199	Aa	90164392	81077784	79509323	0.958375	8.14
	C475	Aa	113715762	103063966	101194817	0.960791	10.41
	D1103	Aa	103838968	92784454	90859850	0.957921	8.31
	D578	Aa	99219220	88076294	86174024	0.957302	7.79
	D589	Aa	98183868	86769052	84944565	0.957647	7.77
	D610	Aa	98837164	87769432	85839413	0.956356	7.91
	D665	Aa	103360822	91995806	90083712	0.95841	8.26
	12G	Aa	85122138	78270446	76805711	0.962151	7.68
	9G	Aa	76476330	68732550	67192316	0.955176	6.91
White-eggshelled ducks	8	aa	96216642	89620030	87808341	0.955061	8.3
	19	aa	78713688	68605218	67187930	0.957998	7.12
	33	aa	104827398	94717672	92751064	0.957418	8.06
	37	aa	105962908	95228644	93284669	0.958475	8.06
	43	aa	104903226	95483258	93636920	0.959022	8.06
	45	aa	103645706	93589636	91772974	0.9612	8.02
	67	aa	80773774	71633016	70276057	0.960373	6.49
	73	aa	106149424	96468504	94573103	0.959957	8.7
	81	aa	104235118	94268232	92525622	0.959827	8.49
	87	aa	94542410	85911722	84341397	0.960739	7.85
	17W	aa	86157716	78715244	77024455	0.955745	7.24
	18W	aa	95760002	87740020	86019787	0.959062	7.91
	19W	aa	99596914	91011930	89226416	0.959275	8.42
	2W	aa	88957108	80854890	79206733	0.95789	7.38
	D118	aa	95782272	87091934	85392499	0.959471	7.94
	D121	aa	96906550	87893368	86148389	0.958178	7.82
	D124	aa	100761158	89831932	87883327	0.95694	8.06
	D138	aa	91848922	83066528	81365051	0.958433	7.56
	D211	aa	100210338	89488536	87715333	0.959448	8.06
	14W	aa	75923352	69511324	68137981	0.958148	6.8
	3W	aa	90774268	82499706	80880526	0.960349	7.72
	4W	aa	79163388	72247928	70938190	0.962144	6.83
	6W	aa	93617382	84999862	83377735	0.958608	7.71
	8W	aa	88684510	80654220	79086895	0.958611	7.97
Average							8.01796
